# Supplementary material for: Deriving 2D M2X3 (M = Mo, W, X = S, Se) by periodic assembly of chalcogen vacancy lines in their MX2 counterparts
Source: Royal Society of Chemistry journal article supplement (doi:10.1039/c9nr10144f), 2020-01-01
Supplement: c9nr10144f1.pdf [file c9nr10144f1.pdf]

**Title: Supplementary Structural File Description:**

**Description:** File “Mo2S3-pmc21.cif ” is the structural file for Mo<sub>2</sub>S<sub>3</sub> according to Pmc21 space group. Considering the 2D feature of Mo<sub>2</sub>S<sub>3</sub>, we treat the basal plane of Mo<sub>2</sub>S<sub>3</sub> as x-y plane in our article. The x-axis, y-axis, z-axis in the manuscript should corresponding to x-axis, z-axis, y-axis in the structural file, respectively. Note that, b=2 nm is an arbitrary value as long as b is larger than the thickness of monolayer Mo<sub>2</sub>S<sub>3</sub>.
